# Supplementary material for: Pd–In intermetallic alloy nanoparticles: highly selective ethane dehydrogenation catalysts
Source: Royal Society of Chemistry journal article supplement (doi:10.1039/c6cy00491a), 2016-01-01
Supplement: c6cy00491a1.pdf [file c6cy00491a1.pdf]

**Pd-In intermetallic alloy nanoparticles:  
highly selective ethane dehydrogenation catalysts**

Zhenwei Wu <sup>a</sup>, Evan C. Wegener <sup>a</sup>, Han-Ting Tseng <sup>a</sup>, James R. Gallagher <sup>b</sup>, James W. Harris <sup>a</sup>,  
Rosa E. Diaz <sup>c</sup>, Yang Ren <sup>d</sup>, Fabio H. Ribeiro <sup>a</sup>, Jeffrey T. Miller <sup>\*ab</sup>

<sup>a</sup> School of Chemical Engineering, Purdue University, 480 Stadium Mall Drive, West Lafayette, IN 47907-2100, USA

<sup>b</sup> Chemical Science and Engineering Division, Argonne National Laboratory, 9700 S. Cass Avenue, Argonne, IL 60439, USA

<sup>c</sup> Birck Nanotechnology Center, Purdue University, 1205 W. State Street, West Lafayette, IN 47907-2057

<sup>d</sup> X-Ray Science Division, Argonne National Laboratory, 9700 S. Cass Avenue, Argonne, IL 60439, USA

**Electronic Supplementary Information**

**Contents**

|                       | Page |
|-----------------------|------|
| <b>Arrhenius Plot</b> | 2    |
| <b>XAS</b>            | 3    |
| <b>XRD</b>            | 7    |

## Arrhenius Plot

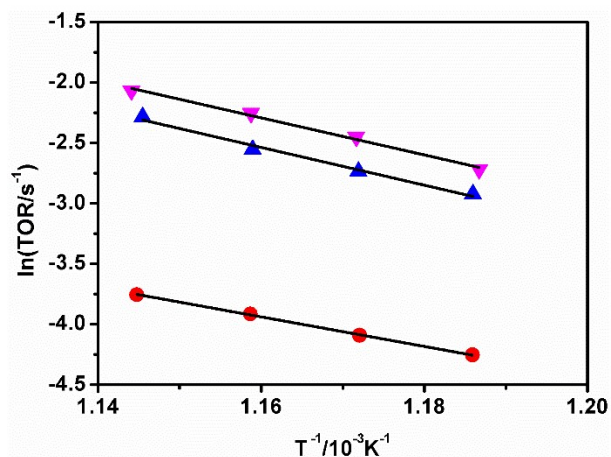

**Supplementary fig. S1** Arrhenius plot for ethane dehydrogenation over Pd-In 0.2 (red), Pd-In 0.8 (blue) and Pd-In 2.0 (magenta) catalysts. Activation energy measurements were conducted between 570 and 600 °C under 5 % C<sub>2</sub>H<sub>6</sub>, 2 % H<sub>2</sub>, 0.5 % C<sub>2</sub>H<sub>4</sub>, 43.2 % He, and balance N<sub>2</sub> at 1 atm with a total flow rate of 150 cm<sup>3</sup>/min. The conversion in all tests are below 10 % and far from equilibrium as confirmed by approach to equilibrium index  $\beta$ . The TORs have been corrected with the approach to equilibrium index  $\beta$ .

## XAS

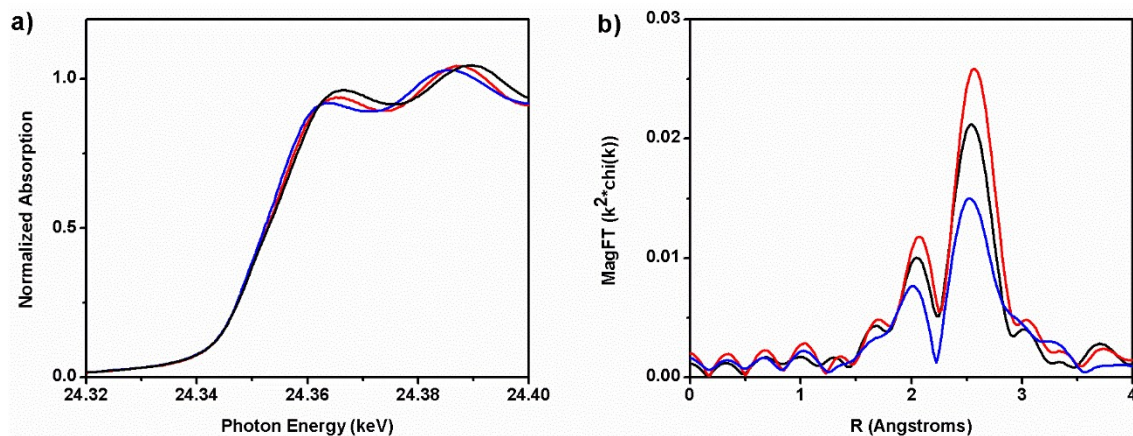

**Supplementary fig. S2** a) XANES and b) magnitude of the Fourier Transform of the EXAFS at Pd edge of Pd (black), Pd-In 0.2 (red) and Pd-In 0.8 (blue) catalysts. The catalysts were reduced at 600 °C in a 4 % H<sub>2</sub>/He mixture at 50 cm<sup>3</sup>/min. After reduction, the samples were purged with He at 100 cm<sup>3</sup>/min and cooled to room temperature before the XAS spectra were obtained.

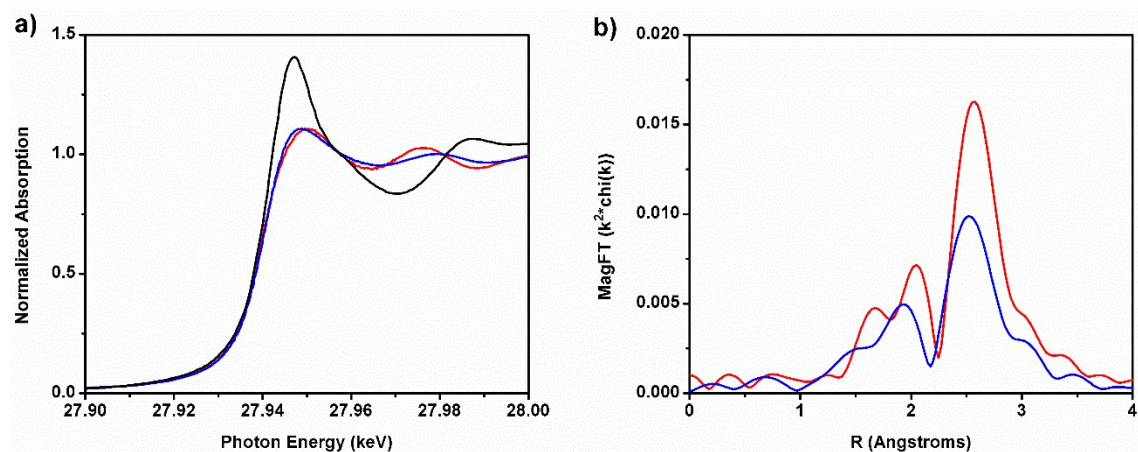

**Supplementary fig. S3** a) XANES at the In edge of Pd-In 0.2 (red) and Pd-In 0.8 (blue) catalysts compared with Indium oxide (black) and b) magnitude of the Fourier Transform of the EXAFS at the In edge of Pd-In 0.2 (red) and Pd-In 0.8 (blue) catalysts. The catalysts were reduced at 600 °C in a 4 % H<sub>2</sub>/He mixture at 50 cm<sup>3</sup>/min. After reduction, the samples were purged with He at 100 cm<sup>3</sup>/min and cooled to room temperature before the XAS spectra were obtained.

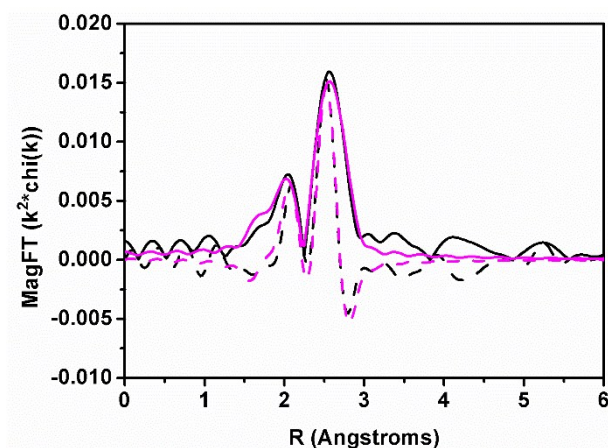

**Supplementary figure S4.** Fitting results of the R-space EXAFS spectrum at Pd edge of pre-reduced Pd-In 2.0 as an example for Pd-In catalysts. The solid black line represents the FT magnitude, the dashed black line the imaginary part of the FT while the magenta solid and dashed lines are the fits of the magnitude and the imaginary part respectively. ( $3.0 \text{ \AA}^{-1} < k < 12.0 \text{ \AA}^{-1}$ ,  $1.6 \text{ \AA} < R < 2.9 \text{ \AA}$ ).

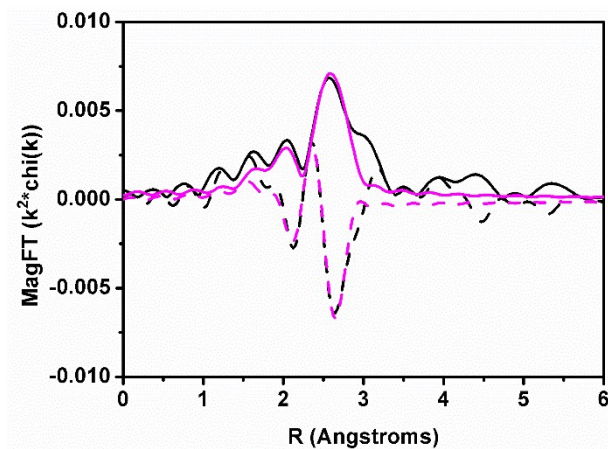

**Supplementary figure S5.** Fitting results of the R-space EXAFS spectrum at In edge of pre-reduced Pd-In 2.0 as an example for Pd-In catalysts. The solid black line represents the FT magnitude, the dashed black line the imaginary part of the FT while the magenta solid and dashed lines are the fits of the magnitude and the imaginary part respectively. ( $3.0 \text{ \AA}^{-1} < k < 12.0 \text{ \AA}^{-1}$ ,  $1.8 \text{ \AA} < R < 2.8 \text{ \AA}$ ).

## XRD

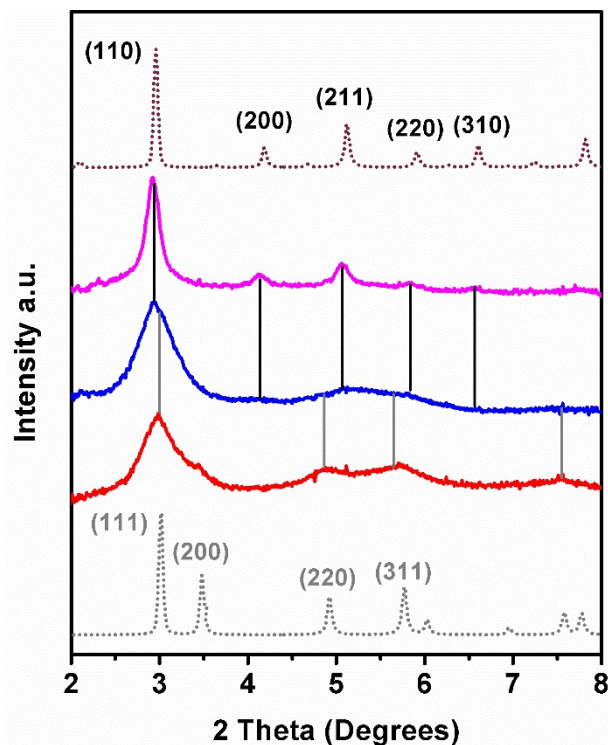

**Supplementary fig. S6** Background subtracted *in situ* XRD pattern of Pd-In-0.2 (red), Pd-In-0.8 (blue), and Pd-In-2.0 catalyst (magenta, 1/2 the original peak intensity) compared with the simulated XRD pattern (with major peaks indexed) of bulk FCC Pd (grey, dotted), and bulk PdIn intermetallic compound phase (black, dotted) at 600 °C after the catalysts were reduced under 50 cm<sup>3</sup>/min 3 % H<sub>2</sub>/Ar flow at 600 °C for 20 min. The grey vertical line marks the diffraction features in the samples from FCC Pd phase, while the black vertical line marks those from PdIn IMC phase. Except for peak displacement caused by thermal induced lattice expansion, the patterns show the same features as those taken at RT, indicating unchanged crystal structure of the catalysts in the two different temperature.

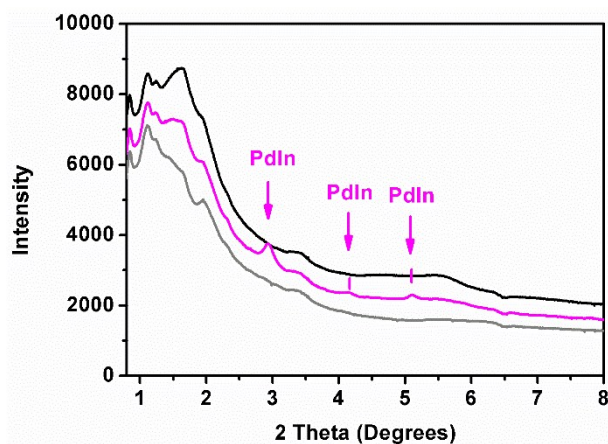

**Supplementary fig. S7** XRD pattern raw data of Pd-In 2.0/SiO<sub>2</sub> catalysts (magenta) compared with empty cell (grey) and the cell loaded with only SiO<sub>2</sub> (black). The data was recorded *in situ* at RT in 3 % H<sub>2</sub>/Ar flow after the samples were reduced under 50 cm<sup>3</sup>/min 3 % H<sub>2</sub>/Ar flow at 600 °C for 20 min. The data of Pd-In 2.0/SiO<sub>2</sub> and SiO<sub>2</sub> are slightly shifted up in vertical axis for better visualization.
